# Supplementary material for: Remote video auditing with real-time feedback in an academic surgical suite improves safety and efficiency metrics: a cluster randomised study
Source: PubMed Central journal article supplement — BMJ Qual Saf. 2015 Dec 11;25(12):947–53. doi: 10.1136/bmjqs-2015-004226 (PMC5256234; doi:10.1136/bmjqs-2015-004226), 2015-12-11

## Supplementary Material

Figure 1. Surgical Safety Checklist; Front (a) and back (b).

(a).

| Can be done individually     | SIGN IN/BRIEFING (prior to procedure room)                                                                                    | RESPONDER                    |
|------------------------------|-------------------------------------------------------------------------------------------------------------------------------|------------------------------|
| Proceduralist                | "PLEASE TELL ME YOUR NAME and DOB" (confirm from ID band)*                                                                    | Patient/Guardian             |
| Proceduralist                | "PLEASE TELL ME WHAT PROCEDURE WE ARE DOING?" (which side?)*                                                                  | Patient/Guardian             |
| Proceduralist                | Obtain/ Confirm consent                                                                                                       | Patient/Guardian             |
| Proceduralist                | Speak with nurse: equipment/devices                                                                                           | Nurse                        |
| Proceduralist                | Discuss sedation/anesthesia if applicable re: plan                                                                            | Anesthesia                   |
| Proceduralist                | Mark side/site if appropriate                                                                                                 | Proceduralist                |
| Proceduralist                | If "high risk" of 'never event' , were radiographic studies reviewed by two credentialed practitioners <b>AND documented?</b> | Proceduralist                |
| Anesthesia                   | "PLEASE STATE YOUR NAME and DOB" (confirm from ID band)*                                                                      | Patient/Guardian             |
| Anesthesia                   | "PLEASE TELL ME WHAT PROCEDURE WE ARE DOING?" (which side?)*                                                                  | Patient/Guardian             |
| Anesthesia                   | "DO YOU HAVE ANY ALLERGIES?"*                                                                                                 | Patient/Guardian             |
| Anesthesia                   | Speak with Proceduralist re: plan and availability                                                                            | Proceduralist                |
| Anesthesia                   | Check <b>side and site</b> mark; mark site if regional/block planned                                                          | Anesthesia                   |
| Nurse                        | "PLEASE STATE YOUR NAME and DOB" (confirm from ID band)*                                                                      | Patient/Guardian             |
| Nurse                        | "PLEASE TELL ME WHAT PROCEDURE WE ARE DOING?" (which side?)*                                                                  | Patient/Guardian             |
| Nurse                        | "DO YOU HAVE ANY ALLERGIES?"*                                                                                                 | Patient/Guardian             |
| Nurse                        | Speak with Proceduralist re: equipment/devices                                                                                | Proceduralist                |
| <b>MUST BE DONE AS TEAM</b>  | <b>VERIFY SIGN IN ( ARRIVAL IN PROCEDURE ROOM)- USE SCRIPT</b>                                                                | <b>RESPONDER</b>             |
| Anesthesia                   | "ARE WE READY TO VERIFY THE SIGN IN?"                                                                                         | Nurse                        |
|                              | <b>Anesthesia secures consent and confirms answers</b>                                                                        |                              |
| Anesthesia                   | "PLEASE TELL ME YOUR NAME and DOB?" * (nurse; confirm ID band)                                                                | Patient                      |
| Anesthesia                   | "HAVE YOU SPOKEN TO PROCEDURALIST ABOUT EQUIPMENT/NEEDS?"                                                                     | Nurse                        |
| Anesthesia                   | Confirm Proceduralist availability and sedation plan                                                                          | none                         |
| Anesthesia                   | "MACHINE CHECK IS COMPLETE" (where appropriate)                                                                               | Anesthesia                   |
| Anesthesia                   | "PATIENT (HAS/DOES NOT HAVE THESE) RISK ALERTS (diff airway, aspiration, BMI >40, ASA 4/5, sickle cell, fire RISK )           | Anesthesia                   |
| <b>TEAM MEMBERS INVOLVED</b> | <b>MINI TIME OUT (PRIOR TO START OF PROCEDURE - USE SCRIPT)</b>                                                               | <b>RESPONDER</b>             |
| Nurse                        | "ARE WE READY FOR <b>MINI TIME OUT</b> ?"                                                                                     | team involvd                 |
| Nurse                        | "PLEASE INTRODUCE YOURSELF AND YOUR ROLE"                                                                                     | team involvd                 |
| Nurse                        | "WHAT IS Patient NAME/DOB/MRN#? (Confirm wID band/consent)                                                                    | proced/anest                 |
| Nurse                        | "WHAT PROCEDURE ARE WE PERFORMING?"                                                                                           | proced/anest                 |
| Nurse                        | "DO THE SIDE/SITE REQUIRE MARKING? IF YES, PLEASE POINT OUT"                                                                  | proced/anest                 |
|                              | <b>*If patient is unable to respond, team member confirms info from wristband/ consent</b>                                    | <b>Rev: PROC-17-11/11/13</b> |

(b).

| <b>MUST BE DONE AS TEAM</b> | <b>TIME OUT (IN OR- ANES HOLDS SCRIPT)</b>                                                                                  | <b>RESPONDER</b>             |
|-----------------------------|-----------------------------------------------------------------------------------------------------------------------------|------------------------------|
| Anesthesia                  | "ARE WE READY FOR TIME OUT?"                                                                                                | all team                     |
| Anesthesia                  | "PLEASE INTRODUCE YOURSELF AND YOUR ROLE"                                                                                   | all team                     |
| Anesthesia                  | "IS STERILITY CONFIRMED?"                                                                                                   | circulator/ scrub            |
| Nurse                       | Holds ID document other than consent for Surgeon                                                                            | none                         |
| Anesthesia                  | Confirms Surgeons answers with surgical consent                                                                             | none                         |
| Anesthesia                  | "WHAT IS Patient NAME/DOB/MRN#?"                                                                                            | Surgeon                      |
| Anesthesia                  | "WHAT PROCEDURE ARE WE PERFORMING?"                                                                                         | Surgeon                      |
| Anesthesia                  | "DO THE SIDE AND SITE REQUIRE MARKING? IF YES, PLEASE POINT OUT"                                                            | Surgeon                      |
| Anesthesia                  | "IS THE PATIENT CORRECTLY POSITIONED FOR THIS CASE?"                                                                        | Surgeon                      |
| Anesthesia                  | "WHAT DVT PROPHYLAXIS WILL YOU BE PROVIDING BEFORE, DURING AND AFTER SURGERY?"                                              | Surgeon                      |
| Anesthesia                  | "WILL THIS PATIENT REQUIRE SPECIAL FLUIDS OR IRRIGATION ON THE FIELD?"                                                      | Surgeon                      |
| Anesthesia                  | "WHAT IS ESTIMATED DURATION AND EBL?"                                                                                       | Surgeon                      |
| Anesthesia                  | "ARE ALL SUPPLIES, EQUIPMENT, IMAGES, AND IMPLANTS YOU EXPECT PRESENT?"                                                     | Surgeon or Nurse             |
| Anesthesia                  | "IS THIS A HIGH RISK PROCEDURE? IF YES, WERE IMAGES REVIEWED TWO CREDENTIALLED PRACTITIONERS AND DOCUMENTED?"               | Surgeon                      |
| Anesthesia                  | "PROCEDURE CONFIRMED BY CONSENT"                                                                                            | Anesthesia                   |
| Anesthesia                  | State Allergies...                                                                                                          | Anesthesia                   |
| Anesthesia                  | State Anesthetic considerations, including risk alerts...                                                                   | Anesthesia                   |
| Anesthesia                  | State Antibiotic dosing...                                                                                                  | Anesthesia                   |
| Anesthesia                  | "NO BLOOD PRODUCTS REQUIRED" OR " ARE BLOOD PRODUCTS AVAILABLE?"                                                            | Nurse                        |
| Anesthesia                  | Patient disposition...                                                                                                      | none                         |
| Anesthesia                  | "ANYONE HAVE Patient SPECIFIC CONCERNS THAT HAVE NOT BEEN ADDRESSED?"                                                       | any team member              |
| Nurse                       | "WE HAVE INDEPENDENTLY AND COLLECTIVELY IDENTIFIED THE Patient BY NAME AND BIRTH DATE AND HAVE RESOLVED ANY DISCREPANCIES." | all team members             |
|                             | "CONFIRMED"                                                                                                                 | All team members             |
| <b>MUST BE DONE AS TEAM</b> | <b>SIGN OUT (IN OR- CIRC HOLDS SCRIPT)</b>                                                                                  | <b>RESPONDER</b>             |
| Nurse                       | "ARE WE READY TO DO SIGN OUT?"                                                                                              | all team members             |
| Nurse                       | "WHAT IS NAME OF PROCEDURE TO BE RECORDED?"                                                                                 | Surgeon                      |
| Nurse                       | "WHAT IS WOUND CLASS TO BE RECORDED?"                                                                                       | Surgeon                      |
| Nurse                       | "ANY EQUIPMENT OR SUPPLY ISSUES TO BE ADDRESSED?"                                                                           | scrub                        |
| Nurse                       | "IS THE INSTRUMENT AND SPONGE COUNT CORRECT?"                                                                               | scrub                        |
| Nurse                       | "THE SPECIMEN(S) AND PATHOLOGY FORM(S) ARE RECONCILED, LABELLED AND COMPLETED."                                             | Nurse                        |
| Nurse                       | "WHAT IS EBL?"                                                                                                              | Anesthesia                   |
| Nurse                       | "ARE THERE ANY CONCERNS FOR RECOVERY OF THE Patient?"                                                                       | Anesthesia                   |
| Nurse                       | "WHAT IS DISPOSITION OF Patient?"                                                                                           | Anesthesia                   |
|                             |                                                                                                                             | <b>Rev: PROC-17-11/11/13</b> |

**Figure 2.** Assignment of OR's to 'fast' (solid) and 'slow' (dashed) cohort based on baseline period non operative times.

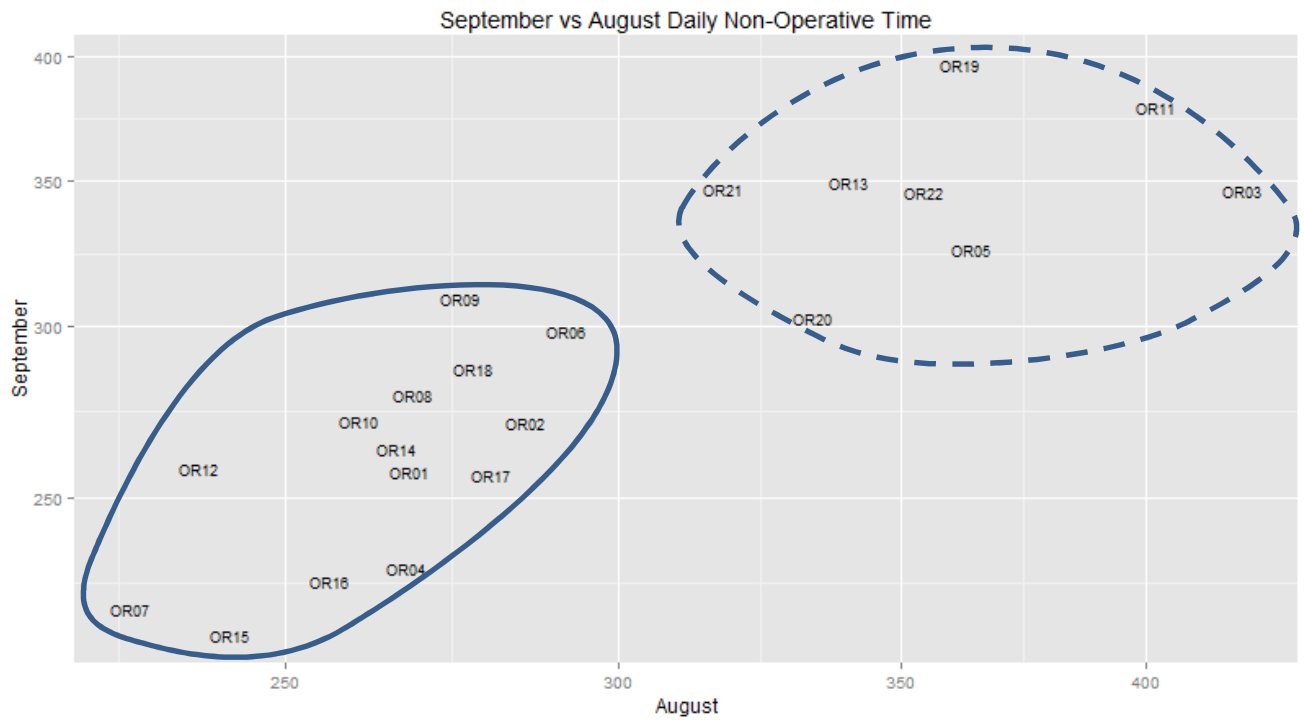

**Figure 3.** Consort diagram showing the intervention phase.

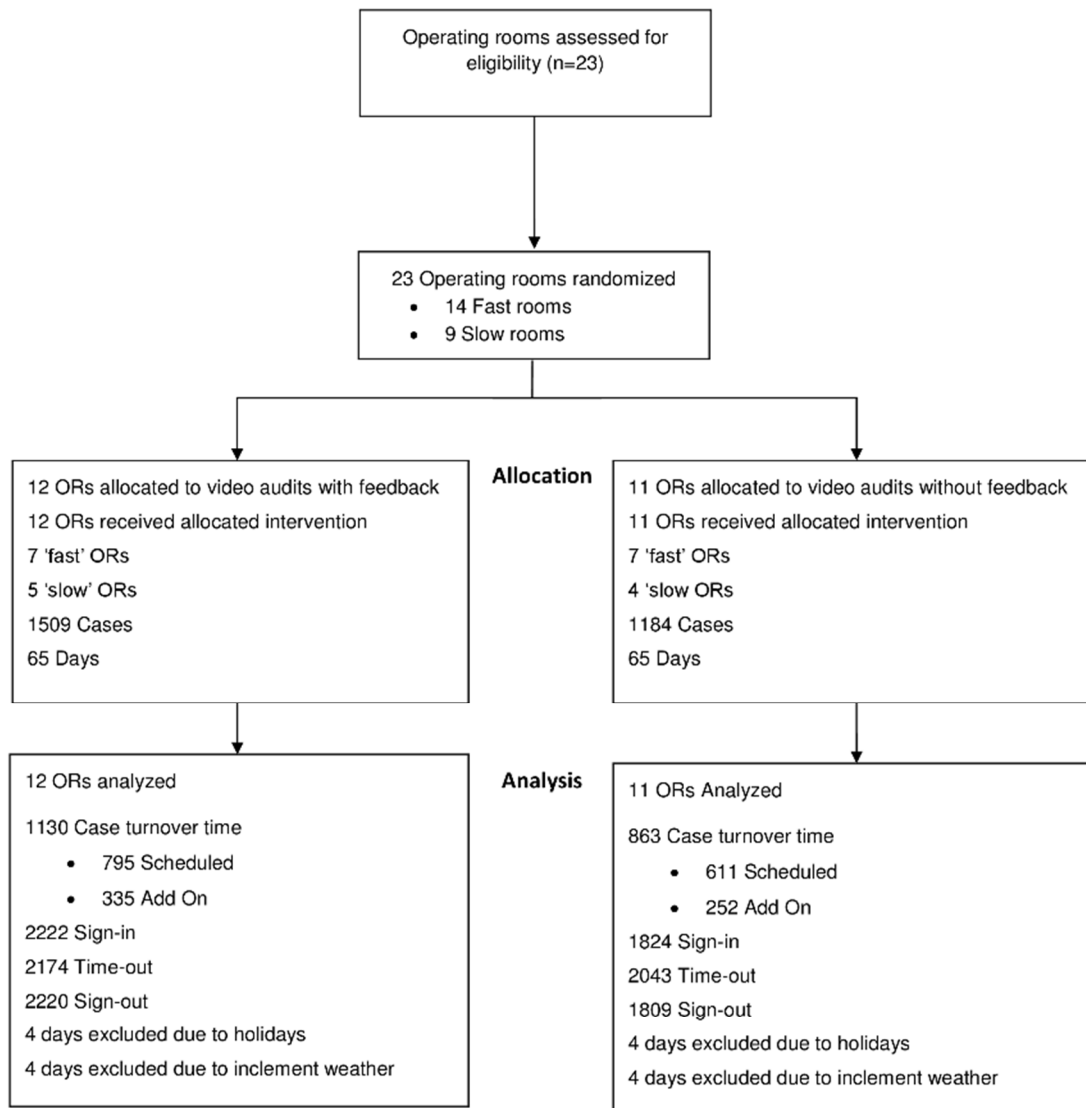

Supplement: bmjqs-2015-004226-s1.pdf [file bmjqs-2015-004226-s1.pdf]
